# Supplementary material for: Self-reported adverse drug effects and associated factors among H. pylori infected patients on standard triple therapy: Prospective follow up study
Source: PubMed Central journal article supplement (PMC6874330; doi:10.1371/journal.pone.0225585), 2019-11-22
Supplement: pone.0225585.s002.pdf [file pone.0225585.s002.pdf]

## Predeveloped structured questionnaire (English version)

### Part I. Sociodemographic data of *H. pylori* positive patients on first encounter

| Sr. No | Questions                   | Response                                                                                                                                                                                                                                                                                     |
|--------|-----------------------------|----------------------------------------------------------------------------------------------------------------------------------------------------------------------------------------------------------------------------------------------------------------------------------------------|
| 100    | Patient Card No: _____      | Code given _____                                                                                                                                                                                                                                                                             |
| 101    | Sex                         | <input type="checkbox"/> Male<br><input type="checkbox"/> Female                                                                                                                                                                                                                             |
| 102    | Age                         | _____ in years                                                                                                                                                                                                                                                                               |
| 103    | Weight                      | _____ Kg                                                                                                                                                                                                                                                                                     |
| 104    | Height                      | _____ Meter                                                                                                                                                                                                                                                                                  |
| 105    | Address                     | Region _____<br>Zone _____<br>Woreda _____<br>Kebele _____<br>Phone No: _____                                                                                                                                                                                                                |
| 106    | Residence                   | <input type="checkbox"/> Rural<br><input type="checkbox"/> Urban                                                                                                                                                                                                                             |
| 107    | Marital status              | <input type="checkbox"/> Single<br><input type="checkbox"/> Married<br><input type="checkbox"/> Divorced<br><input type="checkbox"/> Widowed<br><input type="checkbox"/> Separated                                                                                                           |
| 108    | Religion                    | <input type="checkbox"/> Orthodox<br><input type="checkbox"/> Protestant<br><input type="checkbox"/> Muslim<br><input type="checkbox"/> others, specify _____                                                                                                                                |
| 109    | What is your occupation?    | <input type="checkbox"/> House wife<br><input type="checkbox"/> Gov't Employee<br><input type="checkbox"/> Private Employee<br><input type="checkbox"/> Merchant<br><input type="checkbox"/> Daily laborer<br><input type="checkbox"/> 7. Others, specify _____                              |
| 110    | Your educational status is? | <input type="checkbox"/> Unable to read and write<br><input type="checkbox"/> Read and write<br><input type="checkbox"/> Primary education(1-8 <sup>th</sup> grade)<br><input type="checkbox"/> Secondary education (9-12 <sup>th</sup> grade)<br><input type="checkbox"/> College and above |
| 111    | Ethnicity                   | <input type="checkbox"/> Amhara                                                                                                                                                                                                                                                              |

|     |                               |                                                                                                                                                                           |
|-----|-------------------------------|---------------------------------------------------------------------------------------------------------------------------------------------------------------------------|
|     |                               | <input type="checkbox"/> Tigrie<br><input type="checkbox"/> Agew<br><input type="checkbox"/> Oromo<br><input type="checkbox"/> Guragie<br><input type="checkbox"/> Others |
| 112 | Average monthly family income | in birr _____                                                                                                                                                             |

**Part II: Response of *H. pylori* positive patients about the disease on first encounter**

| Sr. No | Questions                                                                                         | Possible responses                                                                                                                                                                                                                                                                                                                                                  |
|--------|---------------------------------------------------------------------------------------------------|---------------------------------------------------------------------------------------------------------------------------------------------------------------------------------------------------------------------------------------------------------------------------------------------------------------------------------------------------------------------|
| 201    | Have you ever diagnosed with H pylori infection before this?                                      | <input type="checkbox"/> Yes (old)<br><input type="checkbox"/> No (New)                                                                                                                                                                                                                                                                                             |
| 202    | Have you taken triple therapy previously                                                          | <input type="checkbox"/> Yes<br><input type="checkbox"/> No                                                                                                                                                                                                                                                                                                         |
| 203    | When your current health problem started?                                                         | <input type="checkbox"/> Since this week<br><input type="checkbox"/> Since last two weeks<br><input type="checkbox"/> Since a month<br><input type="checkbox"/> Since three months<br><input type="checkbox"/> Since six months<br><input type="checkbox"/> Since a year<br><input type="checkbox"/> Since two years<br><input type="checkbox"/> Before three years |
| 204    | Have you taken medications in the last two weeks?                                                 | <input type="checkbox"/> Yes (can you list _____)<br><input type="checkbox"/> No                                                                                                                                                                                                                                                                                    |
| 205    | When you feel discomfort/pain                                                                     | <input type="checkbox"/> After meal<br><input type="checkbox"/> Before meal<br><input type="checkbox"/> Persistently or Always<br><input type="checkbox"/> At night                                                                                                                                                                                                 |
| 206    | Which alcoholic drink(s) you had taken before you came for medical care? (more than one response) | <input type="checkbox"/> Traditional alcoholic drinks (Tella, Arekie, Teji)<br><input type="checkbox"/> Bears<br><input type="checkbox"/> Woin<br><input type="checkbox"/> Wuski<br><input type="checkbox"/> Others, specify _____                                                                                                                                  |
| 207    | Do you have history of other chronic illnesses? (more than one response is possible)              | <input type="checkbox"/> Liver disease<br><input type="checkbox"/> Kidney disease<br><input type="checkbox"/> Diabetes<br><input type="checkbox"/> Hypertension<br><input type="checkbox"/> Asthma<br><input type="checkbox"/> Oher _____                                                                                                                           |
| 208    | Do you smoke?                                                                                     | <input type="checkbox"/> Yes<br><input type="checkbox"/> No                                                                                                                                                                                                                                                                                                         |

**Part III: Response of *H. pylori* positive patients on second encounter**

| Sr. No | Questions                                                                                        | Possible responses                                                                                                                                                             |
|--------|--------------------------------------------------------------------------------------------------|--------------------------------------------------------------------------------------------------------------------------------------------------------------------------------|
| 300    | Can you give me your appointment card?                                                           | Card No: _____                                                                                                                                                                 |
| 301    | Could you stand on the balance here?                                                             | Patient weight: _____                                                                                                                                                          |
| 302    | How much confident are you on your medication administration                                     | <input type="checkbox"/> Surely complete (100%)<br><input type="checkbox"/> Mostly (80%)<br><input type="checkbox"/> Partially<br><input type="checkbox"/> Somewhat impossible |
| 303    | What are the major adverse drug effect(s) you encounter during therapy                           | _____<br>_____<br>_____<br>_____                                                                                                                                               |
| 304    | Have you used homemade remedies during therapy                                                   | <input type="checkbox"/> Yes<br><input type="checkbox"/> No                                                                                                                    |
| 305    | What modern medication other than the three drugs you took for the illness before you came here? | _____<br>_____<br>_____                                                                                                                                                        |
| 306    | What you are feeling on your previous health problem now                                         | <input type="checkbox"/> I am feeling nothing<br><input type="checkbox"/> Improved but still feeling<br><input type="checkbox"/> Not improved at all                           |

ቀድሞ የተደራጀ መጠይቅ (የአማራጭ ቅጽ)

ክፍል አንድ. የጨጓራ ባክቴሪ መኖሩ የታወቀላቸው የጥናቱ ተሳታፊዎች የኢኮኖሚያዊ እና ማህበራዊ መጠይቆች

| ተ.ቁ | ጥያቄ            | መልስ                                                                                                                                                                                                                              |
|-----|----------------|----------------------------------------------------------------------------------------------------------------------------------------------------------------------------------------------------------------------------------|
| 100 | ካርድ ቁጥር: _____ | የተሰጠው ልዩ መለያ: _____                                                                                                                                                                                                              |
| 101 | ፆታ:            | <input type="checkbox"/> ወንድ<br><input type="checkbox"/> ሴት                                                                                                                                                                      |
| 102 | እድሜ            | _____ በአመት                                                                                                                                                                                                                       |
| 103 | ክብደት           | _____ በኪሎ ግራም                                                                                                                                                                                                                    |
| 104 | ቁመት            | _____ በሜትር                                                                                                                                                                                                                       |
| 105 | አድራሻ           | ክልል _____<br>ዞን _____<br>ወረዳ _____<br>ቀበሌ _____<br>ስልክ ቁጥር: _____                                                                                                                                                                |
| 106 | የመኖሪያ ቦታ       | <input type="checkbox"/> ገጠር<br><input type="checkbox"/> ከተማ                                                                                                                                                                     |
| 107 | የገብቻ ሁኔታ       | <input type="checkbox"/> ያላገባ<br><input type="checkbox"/> ያገባ<br><input type="checkbox"/> የተፋታ<br><input type="checkbox"/> በሞት የተለያዩ<br><input type="checkbox"/> በቦታ የተለያዩ                                                       |
| 108 | የሚከተሉት ሀይማኖት   | <input type="checkbox"/> ኦርቶዶክስ ተዋህዶ<br><input type="checkbox"/> ፕሮቴስታንት<br><input type="checkbox"/> እስልምና<br><input type="checkbox"/> ሌላ ይጠቀስ _____                                                                             |
| 109 | ስራ             | <input type="checkbox"/> የቤት እመቤት<br><input type="checkbox"/> የመንግስት ተቀጣሪ<br><input type="checkbox"/> የግል ተቀጣሪ<br><input type="checkbox"/> ነጋዴ<br><input type="checkbox"/> የጉልበት ሰራተኛ<br><input type="checkbox"/> ሌላ ይጠቀስ: _____ |
| 110 | የትምህርት ደረጃ     | <input type="checkbox"/> ያልተማረ<br><input type="checkbox"/> ማንበብ እና መጻፍ የሚችል<br><input type="checkbox"/> አንደኛ ደረጃ (1-8ኛ ክፍል)<br><input type="checkbox"/> ሁለተኛ ደረጃ (9-12ኛ ክፍል)<br><input type="checkbox"/> ከፍተኛ ደረጃ እና በላይ         |

|     |         |                                                                                                                                                                                                        |
|-----|---------|--------------------------------------------------------------------------------------------------------------------------------------------------------------------------------------------------------|
| 111 | ብሄር     | <input type="checkbox"/> አማራ<br><input type="checkbox"/> ትግሬ<br><input type="checkbox"/> አገው<br><input type="checkbox"/> አሮሞ<br><input type="checkbox"/> ጉራጌ<br><input type="checkbox"/> ሌላ የገለጥ:----- |
| 112 | ወርሀዊ ገቢ | ብብር _____                                                                                                                                                                                              |

**ክፍል ሁለት፡ የጨጓራ ባክቴሪ መኖሩ የታወቀላቸው የጥናቱ ተሳታፊዎች ስለህመማቸው የቀረበ መጠይቆች**

| ተ.ቁ | ጥያቄ                                                   | መልስ                                                                                                                                                                                                                                                                                                          |
|-----|-------------------------------------------------------|--------------------------------------------------------------------------------------------------------------------------------------------------------------------------------------------------------------------------------------------------------------------------------------------------------------|
| 201 | ካሁን በፊት የጨጓራ ባክቴሪያ ስለመያዝህ በምርመራ አረጋግጠህ ታውቃለህ?         | <input type="checkbox"/> አዎ (ተገኝቶብኛል)<br><input type="checkbox"/> የለም (መጀመሪያዬ ነው)                                                                                                                                                                                                                            |
| 202 | የጨጓራ ባክቴሪያ የሚያጠፋ ህፍምና ወስደህል?                          | <input type="checkbox"/> አዎ<br><input type="checkbox"/> የለም                                                                                                                                                                                                                                                  |
| 203 | አሁን እያመመህ ያለው ህመም መቼ ጀመረህ?                            | <input type="checkbox"/> ከሳምንት ወዲህ<br><input type="checkbox"/> ሁለት ሳምናት ሆኖአል<br><input type="checkbox"/> አንድ ወር ሆኖአል<br><input type="checkbox"/> ሶስት ወር<br><input type="checkbox"/> ስድስት ወር<br><input type="checkbox"/> አንድ አመት<br><input type="checkbox"/> ሁለት አመት<br><input type="checkbox"/> ከሁለት አመት በላይ |
| 204 | ባለፉት ሁለት ሳምንታት የወሰድኸው መደሀኒት አለ?                       | <input type="checkbox"/> አዎ (ምን _____)<br><input type="checkbox"/> የለም                                                                                                                                                                                                                                       |
| 205 | የህመም ስሜቱ ሚስማህ መቼ ነው?                                  | <input type="checkbox"/> ከምግብ በኋላ<br><input type="checkbox"/> ከምግብ በፊት<br><input type="checkbox"/> ቀኑን በሙሉ<br><input type="checkbox"/> ለሊት                                                                                                                                                                   |
| 206 | ካመት ወዲህ የጠጣህቸውን አልኮል መጠጦች ብታሳውቀኝ? (ከአንድ በላይ መልስ ይቻላል) | <input type="checkbox"/> እቤት ሚዘጋጁትን (ጠላ፤ አረቄ፤ ጠጂ)<br><input type="checkbox"/> ቢራ<br><input type="checkbox"/> ወይን<br><input type="checkbox"/> ውስኪ<br><input type="checkbox"/> ሌላ ይጠቀስ _____                                                                                                                   |
| 207 | ከጨጓራ ሌላ ምን ህመም አለብህ? (ከአንድ በላይ መልስ ይቻላል)              | <input type="checkbox"/> የጉበት ህመም<br><input type="checkbox"/> የኩላሊት ህመም<br><input type="checkbox"/> የስኳር ህመም<br><input type="checkbox"/> የደም ግፊት<br><input type="checkbox"/> አስም<br><input type="checkbox"/> ሌላ ይጠቀስ _____                                                                                   |
| 208 | ታጨሳለህ?                                                | <input type="checkbox"/> አዎ<br><input type="checkbox"/> የለም                                                                                                                                                                                                                                                  |

**ክፍል ሶስት፡ የጨጓራ ባክቴሪ መኖሩ የታወቁ ከህምና ጨርሰው ለተመለሱ የጥናቱ ተሳታፊዎች የቀረበ መጠይቅ**

| ተ.ቁ | ጥያቄ                                         | መልስ                                                                                                                                        |
|-----|---------------------------------------------|--------------------------------------------------------------------------------------------------------------------------------------------|
| 300 | የቀጠሮ ካርድህን ልትሰጠኝ ትችላለህ?                     | ትክክለኛነቱን እና ጊዜውን ማረጋገጥ:                                                                                                                    |
| 301 | እባክህ ከክብደት መለኪያው ቁም?                        | ክብደት በኪሎ ግራም: _____                                                                                                                        |
| 302 | ለህክምና የተሰጡህን መድሃኒቶች ለመውሰድህ ምን ያህል እርግጠኛ ነህ? | <input type="checkbox"/> መቶ በመቶ<br><input type="checkbox"/> በብዛት (≥ 80%)<br><input type="checkbox"/> በከፊል<br><input type="checkbox"/> በትንሹ |
| 303 | መድሃኒቶችን ስትወስድ ያጋጠሙህ የጎንዮሽ ጉዳዮች ምን ምን ነበሩ?   | <hr/> <hr/> <hr/> <hr/>                                                                                                                    |
| 304 | ለጨጓራ ህመሙ ባህላዊ ህክምና በተላባ ወይም በአብሽ ታደርግ ነበር?  | <input type="checkbox"/> አዎ<br><input type="checkbox"/> የለም                                                                                |
| 305 | ስለጨጓራ ህመምህ ከህክምናው በኋላ ምን ይስማህል?             | <input type="checkbox"/> ተሽሎኛል ምንም አይሰማኝም<br><input type="checkbox"/> ቢሻለኝም የህመም ስሜቱ አለ<br><input type="checkbox"/> ምንም አልተሻለኝም            |
