# Supplementary material for: Self-reported adverse drug effects and associated factors among H. pylori infected patients on standard triple therapy: Prospective follow up study
Source: PubMed Central journal article supplement (PMC6874330; doi:10.1371/journal.pone.0225585), 2019-11-22
Supplement: pone.0225585.s003.pdf [file pone.0225585.s003.pdf]

**S2 Table. *H. pylori* stool antigen test (SAT) data collection sample form**

| <b>S. No</b> | <b>Date of 1<sup>st</sup> test</b> | <b>Name</b> | <b>Card No</b> | <b>SAT test before Rx</b> | <b>Regimen of triple therapy (10 days or 14 days)</b> | <b>Date of 2<sup>nd</sup> test</b> | <b>SAT test after Rx</b> |
|--------------|------------------------------------|-------------|----------------|---------------------------|-------------------------------------------------------|------------------------------------|--------------------------|
| 1.           |                                    |             |                |                           |                                                       |                                    |                          |
| 2.           |                                    |             |                |                           |                                                       |                                    |                          |
| 3.           |                                    |             |                |                           |                                                       |                                    |                          |
| 4.           |                                    |             |                |                           |                                                       |                                    |                          |
| 5.           |                                    |             |                |                           |                                                       |                                    |                          |
| 6.           |                                    |             |                |                           |                                                       |                                    |                          |
| 7.           |                                    |             |                |                           |                                                       |                                    |                          |
| 8.           |                                    |             |                |                           |                                                       |                                    |                          |
| 9.           |                                    |             |                |                           |                                                       |                                    |                          |
| 10.          |                                    |             |                |                           |                                                       |                                    |                          |
| 11.          |                                    |             |                |                           |                                                       |                                    |                          |
| 12.          |                                    |             |                |                           |                                                       |                                    |                          |
| 13.          |                                    |             |                |                           |                                                       |                                    |                          |
| 14.          |                                    |             |                |                           |                                                       |                                    |                          |
| 15.          |                                    |             |                |                           |                                                       |                                    |                          |
| 16.          |                                    |             |                |                           |                                                       |                                    |                          |
| 17.          |                                    |             |                |                           |                                                       |                                    |                          |
| 18.          |                                    |             |                |                           |                                                       |                                    |                          |
| 19.          |                                    |             |                |                           |                                                       |                                    |                          |
| 20.          |                                    |             |                |                           |                                                       |                                    |                          |
